# Supplementary material
Source: PubMed Central journal article supplement (PMC6525023)
Supplement: NIHMS1522730-supplement-1.pdf [file NIHMS1522730-supplement-1.pdf]

# S1 related to Fig. 1

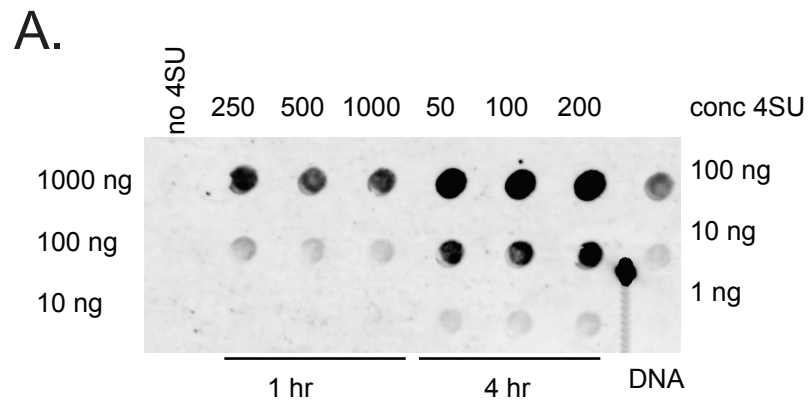

# S2 related to Fig. 2

## A

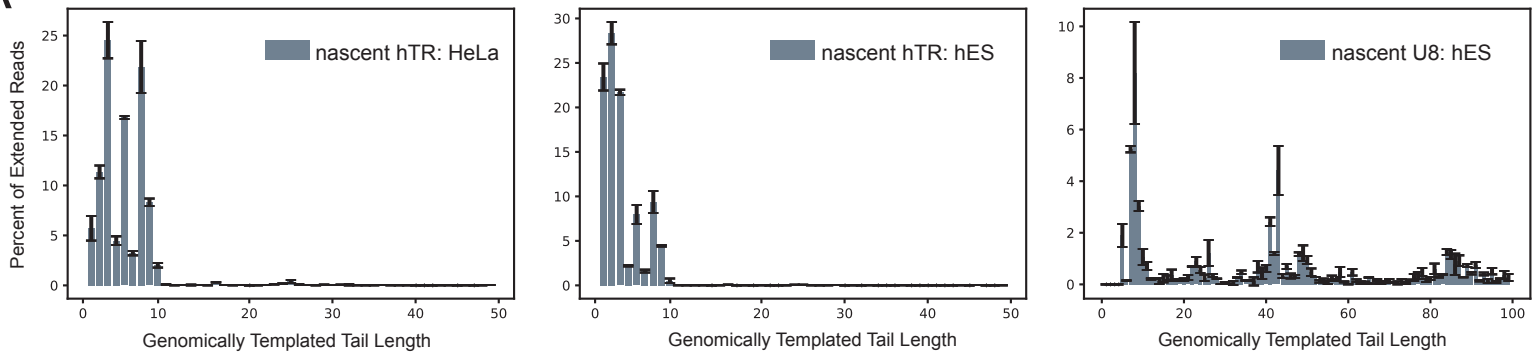

## B

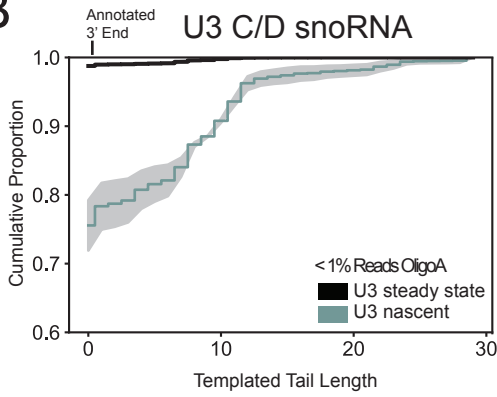

## C

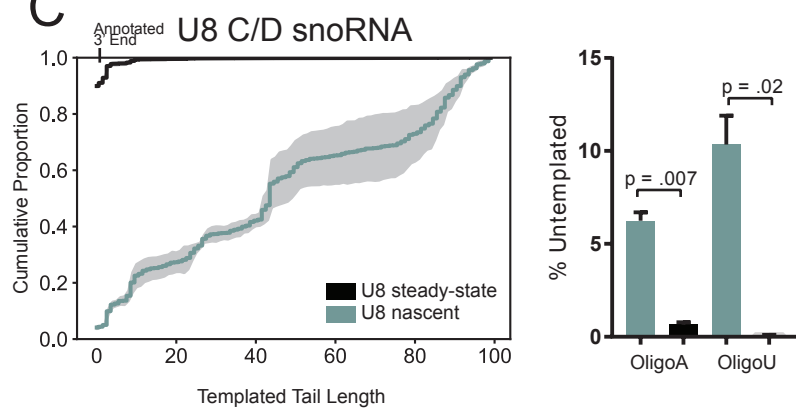

## D

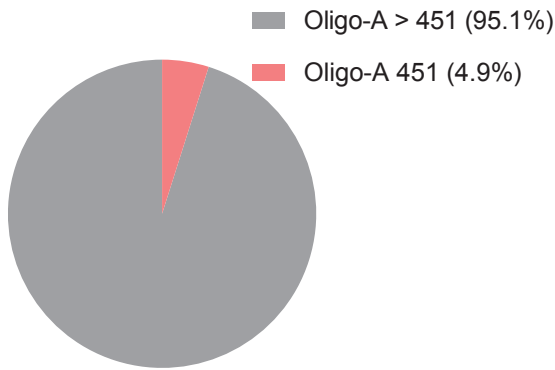

## E

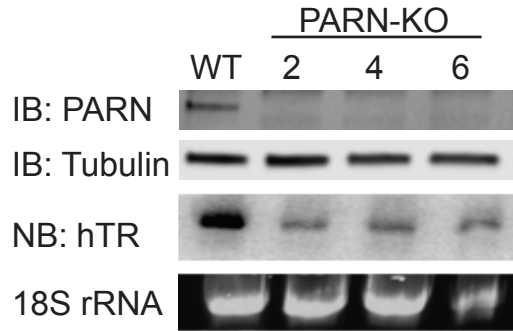

## F

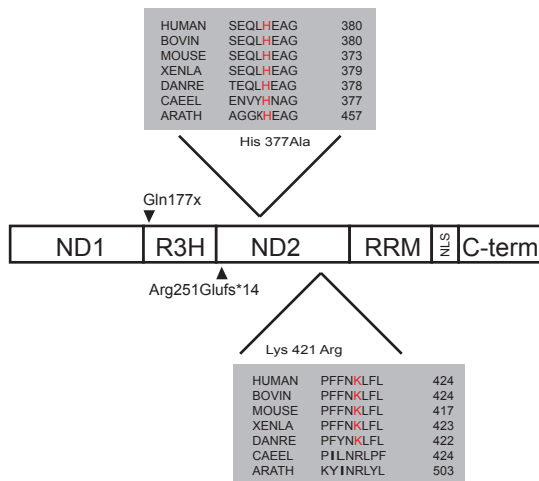

## G

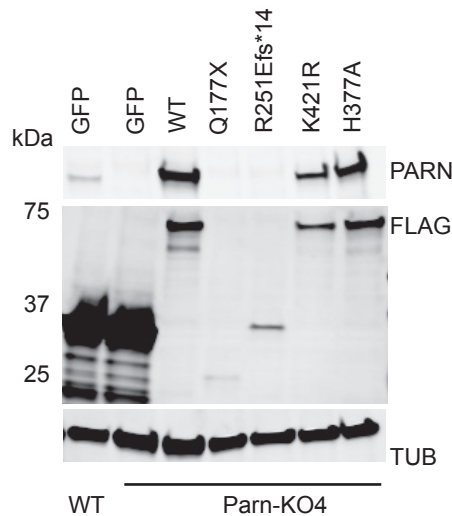

# S3 related to Fig. 3

A

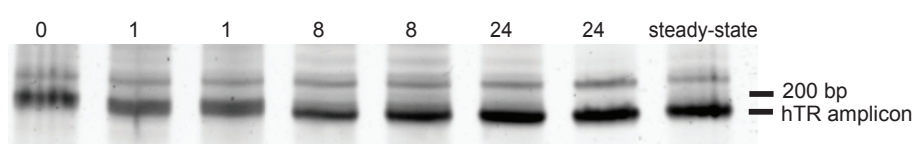

B

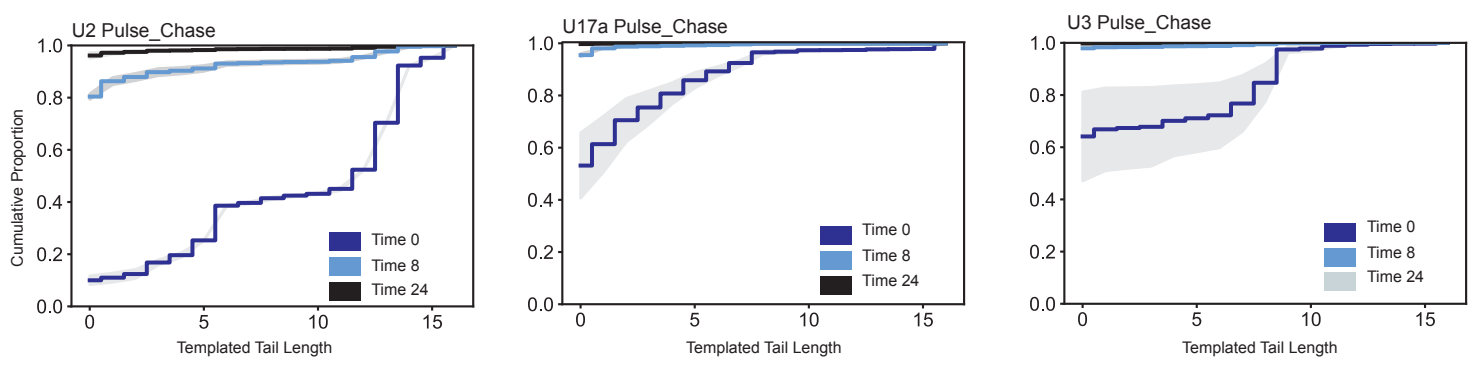

C

| Reference        | Cell Type | Protocol           | hTR $t_{1/2}$ | $k_{decay}$ | R   | $k_{mat}$ | $t_{1/2 mat}$ |
|------------------|-----------|--------------------|---------------|-------------|-----|-----------|---------------|
| Moon 2015        | HEK293    | ActD               | 14.5          | .048        | .2  | .19       | 3.63          |
| Shukla 2016      | HeLa      | ActD               | 25.2          | .028        | .24 | .09       | 7.96          |
| Roake This study | HeLa      | Nascent RNAend-Seq |               |             |     | .14       | 4.94          |

$$\frac{dM}{dt} = k_{mat}P - k_{decay}M = 0$$

$$R = \frac{P}{P + M}$$

$$k_{mat} = k_{decay} \left( \frac{1}{R} - 1 \right)$$

# S4 related to Fig. 4

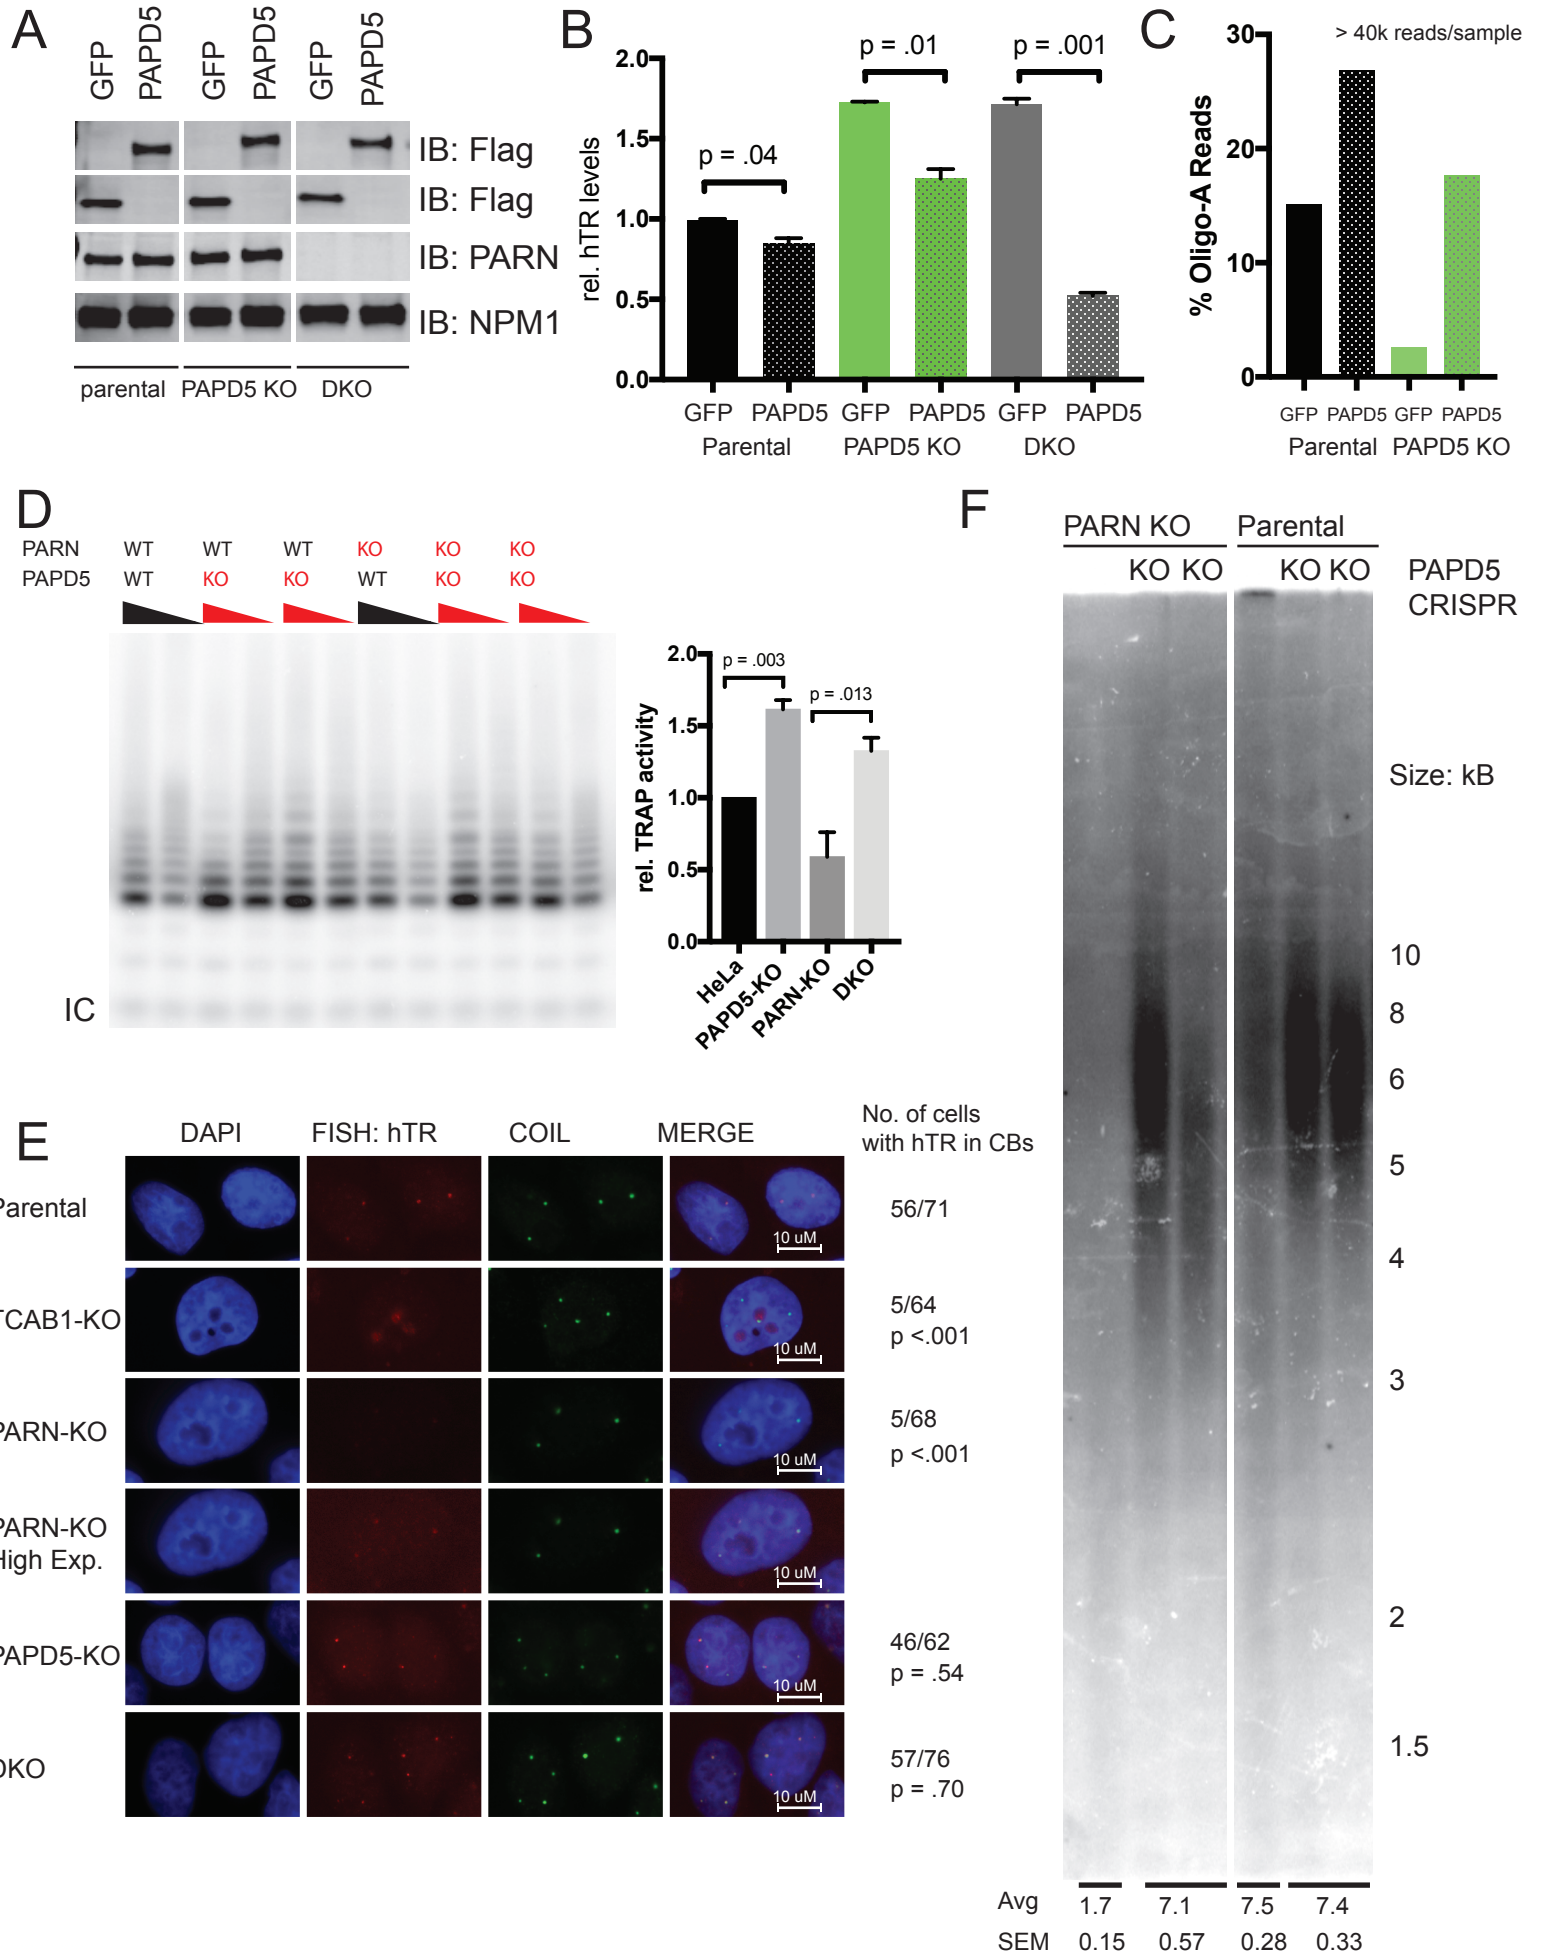

# S5 related to Fig. 4

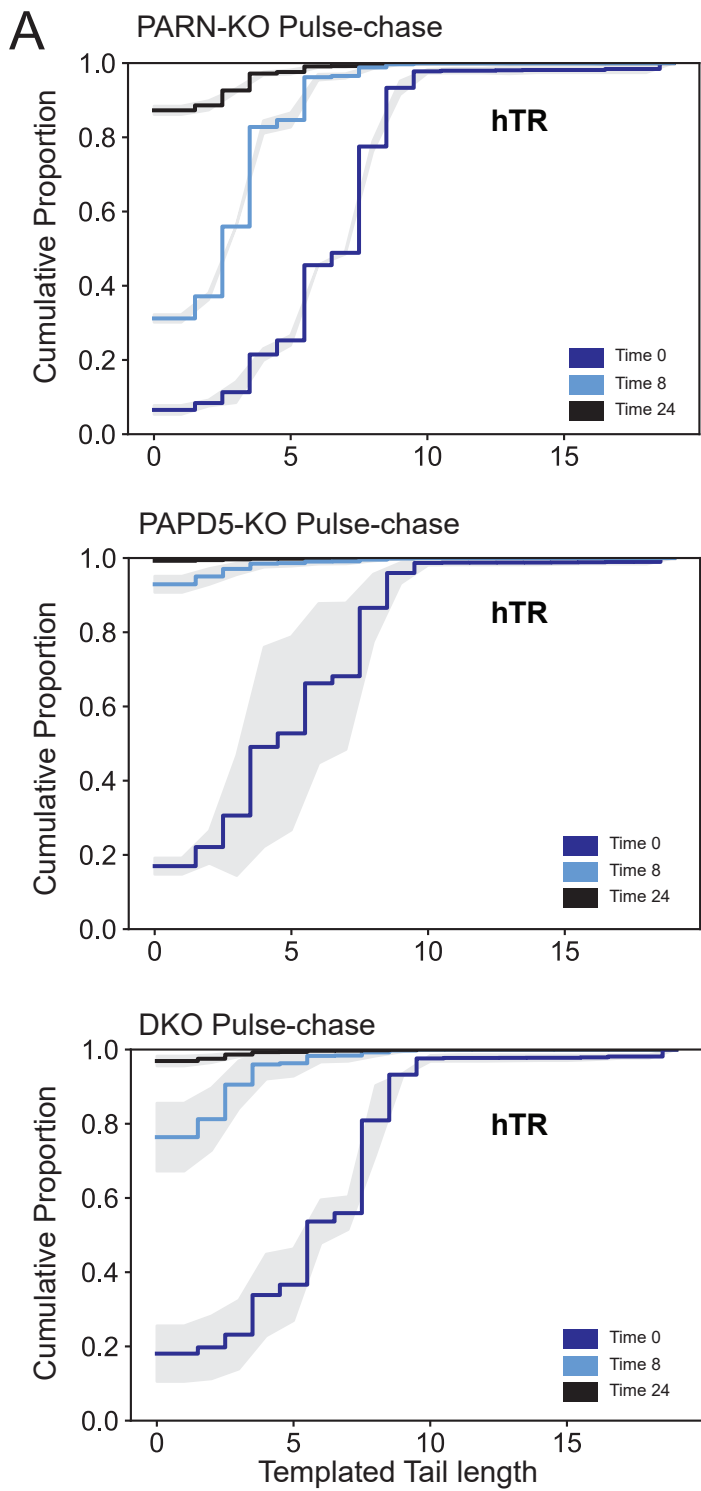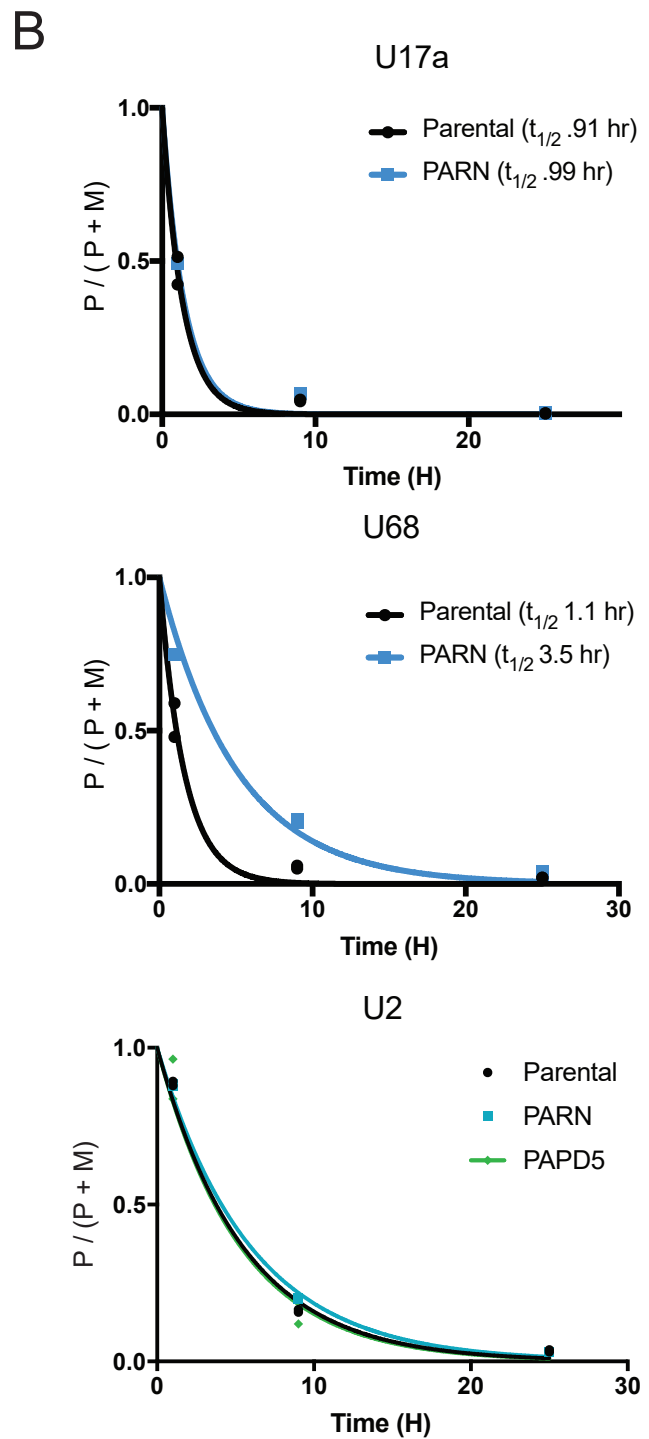

# S6 related to Figure 5

A.

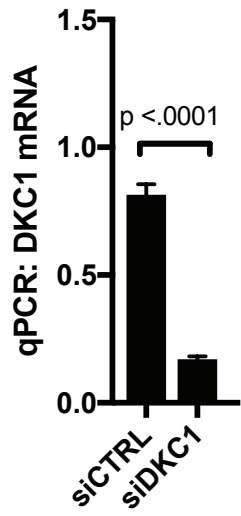

B.

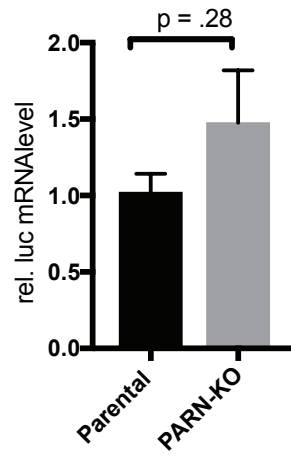

## Supplementary Figures

### Figure S1 related to Figure 1:

A. Streptavidin (SA) dot blot of biotinylated RNA to estimate levels of 4SU incorporation in the indicated conditions. Cells were labeled with 50 – 1000  $\mu$ M 4SU for 1 hr or 4hrs and 10 – 1000 ng of RNA were blotted. A biotin labeled DNA oligo was loaded as a positive control at 1- 100 ng. Biotinylated RNA from 4SU naïve cells was used as a negative control.

### Figure S2 related to Figure 2

A. The relative abundance of different length hTR and U8 precursors in HeLa and hES nascent RNA. Error bars represent S.E.M from 2 biologic replicates.

B. Nascent RNAend-Seq of U3, a box C/D snoRNAs transcribed from an independent polIII locus. Gray shading represents 95% CI from 2 biologic replicates. U3 is 25 kb from the nearest coding transcript. U3 is oligoadenylated at a very low rate, with ~ 2% of nascent molecules having a short (mean = 1.4 nt) untemplated tail.

C. Nascent RNAend-Seq of U8, a box C/D snoRNA transcribed from an independent polIII locus. U8 is embedded 216 nts upstream of the end of the 3' UTR of the gene TMEM107. For U8, it is possible that some of the long transcripts represent the transcripts of the host gene, TMEM107, although no transcripts were found with significant polyA tails (max A tail length = 16 nts). U8 nascent transcripts are found with either oligoU (10% of reads) or oligoA tails (6% of reads) but rarely both (<1% of reads).

D. Distribution of oligo-A marks on nascent hTR molecules. 95% of oligo-A reads are on extended (> 451 nt) hTR molecules. 5% are on mature hTR-451 or shorter forms of hTR.

E. Northern blot (N.B.) probed for hTR in parental (WT) and PARN-KO cells

F. PARN gene diagram showing location of three patient mutations (Gln177X, R251Efs\*14, K421R) and catalytic dead PARN (H377A). Shaded gray boxes show conservation of mutated amino acids. ND = nuclease domain. RRM = RNA recognition motif.

G. W.B. of HeLa or PARN-KO clone 4 HeLa cells transiently transfected with FL-GFP or FL-PARN cDNA. FL-PARN mutants are labeled by amino acid change.

### Figure S3 related to Figure 3

A. 3'RACE amplicon for hTR in pulse-chase experiment shown a time 0, time 1, time 8, and time 24. The 200 bp size marker is shown. The mature hTR amplicon is 189 bp.

B. Nascent RNAend-Seq of U2, U17a, U3, in pulse-chase experiment. Each curve represents an average of two biologic replicates and grey shading represents a 95% CI. Curves were drawn at time 0, time 8, and time 24.

C. Following a kinetic model, we can represent the change in the amount of mature hTR by the following equation:  $\frac{dM}{dt} = k_{mat}P - k_{decay}M$  where P is the amount of precursor, M is the amount of mature hTR,  $k_{mat}$  is the maturation rate constant, and  $k_{decay}$  is the decay rate constant. We can also measure the ratio of precursor in steady state conditions as  $R = \frac{P}{P+M}$ . Using these two equations and assuming steady-state conditions where  $\frac{dM}{dt} = 0$  we acquire the equation  $k_{mat} = k_{decay} \left( \frac{1}{R} - 1 \right)$ . Using decay rates from label-free experiments in the literature (using the RNA polIII inhibitor Actinomycin D), we estimate  $k_{mat}$  and compare it to the values we obtain using our 4SU approach.

#### **Figure S4 related to Figure 4**

A. WB for expression of FL-PAPD5 or FL-GFP in parental HeLa, PAPD5-KO HeLa, or PARN/PAPD5 DKO HeLa.

B. qRT-PCR for hTR relative to parental HeLa+GFP and normalized to GAPDH. Error bars represent S.E.M.

C. Percentage of hTR reads with untemplated A tails in the parental or PAPD5-KO cells expressing either GFP or FL-PAPD5. Each bar represents > 40k reads.

D. Telomeric Repeat Amplification Protocol (TRAP) assay to measure telomerase activity in the indicated cells. For each sample, two lanes are shown, and the second lane is a 3x dilution of the lysate in the first. IC: internal control. TRAP activity quantified at right represents two independent experiments.

E. RNA-FISH for hTR and IF for coilin. Cells with visible hTR foci in Cajal bodies (CBs) were counted and significance was analyzed with Fisher's Exact Test.



F. Telomere length of the indicated cells by telomere restriction fragment southern blot. DNA ladder is shown in kB. Mean telomere length calculated from 3-5 clones per genotype and variance represented as S.E.M.

**Figure S5 related to Figure 4**

A. Cumulative proportion of molecules with the indicated templated tail lengths is plotted in PARN-KO, PAPD5-KO, and DKO cells at time 0 (dark blue) time 8 (light blue) and time 24 (black).

B. Proportion of U17a precursors is plotted for pulse chase experiment as in Figure 4a. From fitted exponential decay curves, the  $t_{1/2}$  of conversion is obtained ( $t_{1/2} = .91$  for parental cells and  $t_{1/2} = .99$  for PARN KO cells). Proportion of U68 precursors is plotted for pulse chase experiment. From fitted exponential decay curves, the  $t_{1/2}$  of conversion is obtained ( $t_{1/2} = 1.1$  for parental cells and  $t_{1/2} = 3.2$  for PARN KO cells). Plot of precursor fraction versus time for U2 snRNA in cells of the indicated genotypes.

**Figure S6 related to Figure 5**

A. qRT-PCR for DKC1 mRNA 48 hrs post siCTRL or siDKC1. Signal is normalized to GAPDH. Results show approximately 4-fold knockdown in siDKC1. Error bars represent S.E.M.

B. qRT-PCR for luciferase mRNA in cells transfected with U1-H/ACA in parental HeLa and PARN-KO HeLa cells. Luciferase cDNA was mixed with U1-H/ACA constructs during transfection to control for transfection efficiency.

Table S1 related to STAR Methods: Primers and oligos

| Oligo Name | Sequence                                                                                                                                                                 | Description                          |
|------------|--------------------------------------------------------------------------------------------------------------------------------------------------------------------------|--------------------------------------|
| sgPARN01   | GCCGACTTCTTCGCCATCGA                                                                                                                                                     | CRISPR guide RNA exon2               |
| sgPARN02   | CCGACTTCTTCGCCATCGAT                                                                                                                                                     | CRISPR guide RNA exon2               |
| sgPARN03   | ACCTGAAAACCTCCCCATCGA                                                                                                                                                    | CRISPR guide RNA exon2               |
| sgPAPD503  | CAGGATCGAGAGTGTAATTA                                                                                                                                                     | CRISPR guide RNA Exon3               |
| Univ RT    | CTACGTAACGATTGATGGTGCCTACAG                                                                                                                                              | 3' RACE primer                       |
| TERC R1    | CACCGCGAAGAGTTGGGCTCTG                                                                                                                                                   | 3' RACE primer                       |
| U2 R1      | TTCTCGGCCTTTTGGCTAAG                                                                                                                                                     | 3' RACE primer                       |
| U3 R1      | CGTGTAAGAGCACCGAAAACC                                                                                                                                                    | 3' RACE primer                       |
| E1 R1      | CGTGGATACACCCGGGAGGTCACTCTC                                                                                                                                              | 3' RACE primer                       |
| U68 R1     | TTGCACCTAAACCCAAGAATC                                                                                                                                                    | 3' RACE primer                       |
| U8 R1      | TTACCTGTTCTCCTCCGGA                                                                                                                                                      | 3' RACE primer                       |
| RAT R1     | GGAGTTTATATGGAAACCTTAGACG                                                                                                                                                | 3' RACE primer                       |
| RAT probe  | ACGTCTAAGGGTTTCCATATAAACTCCTT                                                                                                                                            | NB probe                             |
| U4 Probe   | CGGATAAACCTCATTGGCTACGATACTGCC                                                                                                                                           | NB probe                             |
| U6 Probe   | GGCCATGCTAAATGTTGTTCT<br>TCTCTGTATCGTTCCAATT                                                                                                                             | NB probe                             |
| TERC11F    | CGCTGTTTTTCTCGCTGACT                                                                                                                                                     | qPCR primer                          |
| TERC11R    | GCTCTAGAATGAACGGTGGAA                                                                                                                                                    | qPCR primer                          |
| TERCext1R  | CCACCAACAGGAAAGCGAAC                                                                                                                                                     | qPCR primer                          |
| TERCext2R  | CCAACAGGAAAGCGAACTGC                                                                                                                                                     | qPCR primer                          |
| GAPDH60F   | AGCCACATCGCTCAGACAC                                                                                                                                                      | qPCR primer                          |
| GAPDH60R   | GCCCAATACGACCAAATCC                                                                                                                                                      | qPCR primer                          |
| B2M F      | ACACCAAGTTAGCCCCAAG                                                                                                                                                      | qPCR primer                          |
| B2M R      | ACCCAGACACATAGCAATTCAG                                                                                                                                                   | qPCR primer                          |
| U1 F       | TGGCAGGGGAGATACCATGA                                                                                                                                                     | qPCR primer                          |
| U1 R       | TGCAGTCGAGTTTCCCACAT                                                                                                                                                     | qPCR primer                          |
| Luc F      | AGGTCTTCCCGACGATGA                                                                                                                                                       | qPCR primer                          |
| Luc R      | GTCTTTCCGTGCTCCAAAAC                                                                                                                                                     | qPCR primer                          |
| 5'ETS F    | GAACGGTGGTGTGTCTGTTT                                                                                                                                                     | qPCR primer (Nguyen le et al., 2015) |
| 5'ETS R    | GCGTCTCGTCTCGTCTCACT                                                                                                                                                     | qPCR primer (Nguyen le et al., 2015) |
| U3 F       | ACCGAAAACCACGAGGAAG                                                                                                                                                      | qPCR primer                          |
| U3 R       | CCAAGCAACGCCAGAAAG                                                                                                                                                       | qPCR primer                          |
| TS* primer | AATCCGTCGAGCAGAGTT                                                                                                                                                       | Labeled TRAP primer                  |
| TRF primer | CCCTAACCTAACCCTAA                                                                                                                                                        | Labeled TRF primer                   |
| hTR FISH   | GCCTTCTCAGTTAGGGTTA;<br>AAGTCAGCGAGAAAAACAGC;<br>TCTAGAATGAACGGTGGAAAG;<br>CCAGCAGCTGACATTTTTT;<br>GCTGACAGAGCCCAACTCTT;<br>GTCCACAGCTCAGGGAATC;<br>CATGTGTGAGCCGAGTCCTG | RNA FISH                             |

Table S2 related to Figure 2 and Figure 4: Genotypes of Cells Used In This Study

| Name                                                        | Sequence                                                                                                                                                                    |
|-------------------------------------------------------------|-----------------------------------------------------------------------------------------------------------------------------------------------------------------------------|
| WT PARN Exon 2                                              | GCC GAC TTC TTC GCC ATC GAT GGG GAG TTT TCA<br>A D F F A I D G E F S                                                                                                        |
| PARN-KO L4<br>D28E_fs<br>D28R_fs                            | GCC GAC TTC TTC GCC ATC GA- -GG GAG TTT TCA<br>GCC GAC TTC TTC GCC ATT <b>CGA TGG GGA GTT TTC</b>                                                                           |
| PARN-KO A2<br>I27S_fs<br>I27M_fs                            | GCC GAC TTC TTC GC - ATC GAT GGG GAG TTT TCA<br>GCC GAC TTC TTC GC - - - - GAT GGG GAG TTT TCA                                                                              |
| WT PAPD5 Exon 3                                             | GTG AAC AGG ATC GAG AGT GTA ATT AAG GAG CTC<br>V N R I E S V I K E L                                                                                                        |
| PARN/PAPD5 DKO (2/3het) T8<br>E149A_fs<br>I152L_fs<br>E149K | GTG AAC AGG ATC G - - - - - - - - - - - - - - - - - - CTC<br>GTG AAC AGG ATC GAG AGT GTA -TT AAG GAG CTC<br>GTG AAC AGG AT - - - - - - - - - - - - - - - - - -T AAG GAG CTC |
| PARN/PAPD5 DKO T10<br>K153*<br>I152N_fs<br>S150N_fs         | GTG AAC AGG ATC GAG AGT GTA ATT <b>TAA GGA GCT C</b><br>GTG AAC AGG ATC GAG AGT GTA <b>AAT TAA GGA GCT C</b><br>GTG AAC AGG ATC GAG A - - - - - - - - - - - - - - - - - -   |
| PAPD5 T4<br>K153* (7)<br>V151G_fs (11)                      | GTG AAC AGG ATC GAG AGT GTA ATT <b>TAA GGA GCT C</b><br>GTG AAC AGG ATC GAG AGT G - - - - - - - - - - - - - - - - - -                                                       |
| PAPD5 T6<br>I152L_fs (3)<br>I152N_fs (1)<br>K153* (1)       | GTG AAC AGG ATC GAG AGT GTA - TT AAG GAG CTC<br>GTG AAC AGG ATC GAG AGT GTA <b>AAT TAA GGA GCT C</b><br>GTG AAC AGG ATC GAG AGT GTA ATT <b>TAA GGA GCT C</b>                |

Table S3 related to Figure 2, Figure 3, Figure 4: hTR 3'RACE-Seq Numbers

| File              | TotalReads | <= 451 (%) | > 451 no A (%) | > 451 + A (%) | > 451 (%) | AtailMean | EtailMean | ShortMean |
|-------------------|------------|------------|----------------|---------------|-----------|-----------|-----------|-----------|
| DKO_08_T0         | 22262      | 0.153      | 0.547          | 0.300         | 0.847     | 1.461     | 7.424     | 4.359     |
| DKO_08_T08        | 62764      | 0.729      | 0.103          | 0.168         | 0.271     | 2.399     | 3.922     | 1.744     |
| DKO_08_T24        | 96005      | 0.964      | 0.010          | 0.026         | 0.036     | 2.988     | 4.051     | 1.790     |
| DKO_10_T0         | 19843      | 0.207      | 0.535          | 0.258         | 0.793     | 1.567     | 7.440     | 4.852     |
| DKO_10_T08        | 80857      | 0.795      | 0.066          | 0.140         | 0.205     | 2.760     | 3.539     | 1.648     |
| DKO_10_T24        | 77849      | 0.974      | 0.009          | 0.017         | 0.026     | 2.794     | 3.910     | 1.717     |
| HeLa_01_T0        | 24941      | 0.236      | 0.405          | 0.359         | 0.764     | 1.813     | 7.745     | 4.335     |
| HeLa_01_T05       | 32801      | 0.444      | 0.165          | 0.391         | 0.556     | 2.521     | 3.862     | 1.692     |
| HeLa_01_T08       | 37372      | 0.670      | 0.060          | 0.270         | 0.330     | 2.639     | 3.524     | 1.631     |
| HeLa_01_T12       | 51597      | 0.874      | 0.016          | 0.110         | 0.126     | 3.281     | 3.139     | 1.673     |
| HeLa_01_T24       | 33399      | 0.964      | 0.005          | 0.030         | 0.036     | 3.358     | 3.824     | 1.591     |
| HeLa_02_T0        | 15839      | 0.264      | 0.381          | 0.355         | 0.736     | 1.837     | 7.687     | 4.918     |
| HeLa_02_T05       | 54756      | 0.478      | 0.154          | 0.368         | 0.522     | 2.436     | 3.783     | 1.613     |
| HeLa_02_T08       | 48471      | 0.670      | 0.050          | 0.279         | 0.330     | 2.697     | 3.414     | 1.535     |
| HeLa_02_T12       | 54809      | 0.875      | 0.016          | 0.110         | 0.125     | 3.003     | 3.526     | 1.539     |
| HeLa_02_T24       | 37353      | 0.954      | 0.008          | 0.038         | 0.046     | 3.275     | 4.092     | 1.473     |
| HeLa_nascent1_1hr | 29304      | 0.242      | 0.394          | 0.364         | 0.758     | 2.198     | 6.123     | 2.450     |
| HeLa_nascent1_4hr | 19253      | 0.511      | 0.144          | 0.345         | 0.489     | 3.027     | 4.550     | 1.584     |
| HeLa_nascent2_1hr | 25104      | 0.246      | 0.383          | 0.371         | 0.754     | 2.304     | 5.911     | 2.056     |
| HeLa_nascent2_4hr | 19846      | 0.595      | 0.098          | 0.308         | 0.405     | 3.202     | 3.750     | 1.366     |
| HeLa_unbound1_1hr | 28739      | 0.808      | 0.036          | 0.156         | 0.192     | 2.949     | 3.752     | 1.960     |
| HeLa_unbound2_1hr | 28904      | 0.807      | 0.038          | 0.155         | 0.193     | 2.999     | 3.549     | 2.152     |
| hES_nascent1      | 20480      | 0.269      | 0.329          | 0.402         | 0.731     | 2.142     | 4.243     | 1.791     |
| hES_nascent2      | 12360      | 0.280      | 0.362          | 0.358         | 0.720     | 1.986     | 4.152     | 1.870     |
| hES_unbound1      | 18197      | 0.823      | 0.035          | 0.142         | 0.177     | 2.441     | 3.594     | 3.354     |
| hES_unbound2      | 13188      | 0.886      | 0.020          | 0.094         | 0.114     | 1.998     | 3.117     | 3.399     |
| PAPD5_04_T0       | 27945      | 0.161      | 0.577          | 0.261         | 0.839     | 1.380     | 5.619     | 2.938     |
| PAPD5_04_T08      | 47156      | 0.920      | 0.046          | 0.034         | 0.080     | 1.708     | 4.045     | 1.674     |
| PAPD5_04_T24      | 145143     | 0.993      | 0.004          | 0.003         | 0.007     | 1.557     | 4.535     | 1.906     |
| PAPD5_06_T0       | 21886      | 0.177      | 0.586          | 0.237         | 0.823     | 1.316     | 6.914     | 5.038     |
| PAPD5_06_T08      | 102572     | 0.935      | 0.036          | 0.028         | 0.065     | 1.875     | 3.742     | 1.686     |
| PAPD5_06_T24      | 88848      | 0.992      | 0.004          | 0.004         | 0.008     | 1.720     | 3.942     | 1.754     |
| PARN_A2_T0        | 13761      | 0.060      | 0.497          | 0.442         | 0.940     | 2.055     | 7.342     | 6.141     |
| PARN_A2_T08       | 43465      | 0.290      | 0.112          | 0.597         | 0.710     | 3.817     | 4.135     | 1.591     |
| PARN_A2_T24       | 19898      | 0.855      | 0.022          | 0.123         | 0.145     | 4.827     | 4.081     | 1.430     |
| PARN_GFP          | 164858     | 0.578      | 0.066          | 0.356         | 0.422     | 4.503     | 4.675     | 1.709     |
| PARN_L4_T0        | 18946      | 0.070      | 0.481          | 0.449         | 0.930     | 1.986     | 7.442     | 5.417     |
| PARN_L4_T08       | 23855      | 0.298      | 0.122          | 0.580         | 0.702     | 3.748     | 4.208     | 1.453     |
| PARN_L4_T24       | 40708      | 0.861      | 0.017          | 0.121         | 0.139     | 4.754     | 4.070     | 1.613     |
| PARN_rescue       | 183225     | 0.870      | 0.019          | 0.111         | 0.130     | 4.030     | 4.049     | 2.128     |
| Total_DKO_08      | 223251     | 0.789      | 0.065          | 0.146         | 0.211     | 2.874     | 4.299     | 1.731     |
| Total_DKO_10      | 270446     | 0.872      | 0.039          | 0.089         | 0.128     | 2.977     | 3.993     | 1.895     |
| Total_HeLa        | 200036     | 0.817      | 0.031          | 0.152         | 0.183     | 3.205     | 4.167     | 1.871     |
| Total_PAPD5_04    | 318255     | 0.952      | 0.020          | 0.028         | 0.048     | 2.237     | 3.930     | 1.712     |
| Total_PAPD5_06    | 210867     | 0.946      | 0.026          | 0.027         | 0.054     | 2.035     | 4.050     | 1.757     |
